# Supplementary material
Source: PubMed Central journal article supplement (PMC3062273)
Supplement: NIHMS266067-supplement-01.pdf [file NIHMS266067-supplement-01.pdf]

**Elevated maternal sgp130 and IL-6 levels and reduced gp130 and SOCS-3 expressions in women complicated with preeclampsia**

ONLINE SUPPLEMENT

Yuping Wang<sup>1,2</sup>, David F. Lewis<sup>3</sup>, Yang Gu<sup>1</sup>, Shuang Zhao<sup>1</sup>, Lynn J. Groome<sup>1</sup>

Departments of Obstetrics and Gynecology<sup>1</sup> and Molecular and Cellular Physiology<sup>2</sup>, Louisiana State University Health Sciences Center - Shreveport, LA

Department of Obstetrics and Gynecology, University of Cincinnati, Cincinnati, Ohio<sup>3</sup>

Address correspondence:

Yuping Wang, M.D., Ph.D.

Department of Obstetrics and Gynecology, LSUHSC-Shreveport

PO Box 33932

Shreveport, LA 71130

(318) 675-5379 (office)

(318) 675-4671 (fax)

E-mail: [ywang1@lsuhsc.edu](mailto:ywang1@lsuhsc.edu)

**Short title:** Gp130 and SOCS-3 in pregnancy and preeclampsia

**Precis:** Increased sgp130 levels, and altered IL-6 receptors and SOCS-3 expressions may associate with increased inflammatory response in women with preeclampsia.

**Table S1A. Clinical information of study subjects from which maternal vessels were examined in the study**

| Variables             | Normal (n=6)      | Preeclampsia (n=6) | p value |
|-----------------------|-------------------|--------------------|---------|
| Maternal age (years)  | 24 ± 4 (19-28)    | 30 ± 6 (23-38)     | 0.055   |
| Racial Status         |                   |                    |         |
| White                 | 1                 | 3                  | ---     |
| Black                 | 4                 | 3                  | ---     |
| Other                 | 1                 | 0                  | ---     |
| BMI                   | 30 ± 4 (24-34)    | 31 ± 6 (27-39)     | 0.831   |
| Blood Pressure (mmHg) |                   |                    |         |
| Systolic              | 119 ± 6 (111-128) | 174 ± 14 (160-193) | 0.009   |
| Diastolic             | 73 ± 6 (67-83)    | 102 ± 8 (93-110)   | 0.009   |
| Gestational Age       |                   |                    |         |
| at delivery (weeks)   | 34 ± 2 (32-37)    | 30 ± 2 (28-33)     | 0.016   |
| Primigravida          | 3                 | 3                  | ---     |

Data are expressed as Mean ± SD (range)

**Table S1B. Clinical information of study subjects from which maternal leukocytes were used in the study**

| Variables             | Normal (n=6)      | Preeclampsia (n=5) | p value |
|-----------------------|-------------------|--------------------|---------|
| Maternal age (years)  | 21 ± 2 (19-24)    | 22 ± 2 (18-24)     | 0.715   |
| Racial Status         |                   |                    |         |
| White                 | 1                 | 2                  | ---     |
| Black                 | 5                 | 3                  | ---     |
| BMI                   | 25 ± 5 (20-31)    | 41 ± 9 (31-52)     | 0.006   |
| Blood Pressure (mmHg) |                   |                    |         |
| Systolic              | 123 ± 9 (113-136) | 183 ± 27 (156-225) | 0.006   |
| Diastolic             | 74 ± 4 (70-79)    | 112 ± 15 (103-137) | 0.006   |
| Gestational Age       |                   |                    |         |
| Blood drawn (weeks)   | 30 ± 3 (28-32)    | 30 ± 4 (24-33)     | 0.648   |
| Delivery (weeks)      | 39 ± 1 (37-40)    | 32 ± 6 (25-38)     | 0.011   |
| Primigravida          | 2                 | 2                  | ---     |
| Mode of Delivery      |                   |                    |         |
| Vaginal               | 6                 | 2                  | ---     |
| Caesarean Section     | 0                 | 3                  | ---     |

Data are expressed as Mean ± SD (range)
